# Supplementary material for: Pulsed Current Constructs 3DM Cu/ZnO Current Collector Composite Anode for Free-Dendritic Lithium Metal Batteries
Source: MDPI journal article supplement (doi:10.3390/batteries9030188), 2023-03-22
Supplement: s1 [file s1]

## Supporting Information

### Pulsed Current Constructs 3DM Cu/ZnO Current Collector Composite Anode for Free-Dendritic Lithium Metal Batteries

**Table S1.** The supplier of raw materials.

| Raw Materials                       | Supplier                                      |
|-------------------------------------|-----------------------------------------------|
| Copper Mesh                         | Anping Hang Eagle Wire Mesh Products Co., Ltd |
| Lithium Foil                        | Tianjin Zhongneng Lithium Industry Co., Ltd   |
| Znic Foil                           | Xinye Electronic Materials Factory            |
| MnSO <sub>4</sub> ·H <sub>2</sub> O | Shanghai EPB Chemical Reagent Co., Ltd        |
| ZnSO <sub>4</sub> ·H <sub>2</sub> O | Sinopharm Chemical Reagent Co., Ltd           |

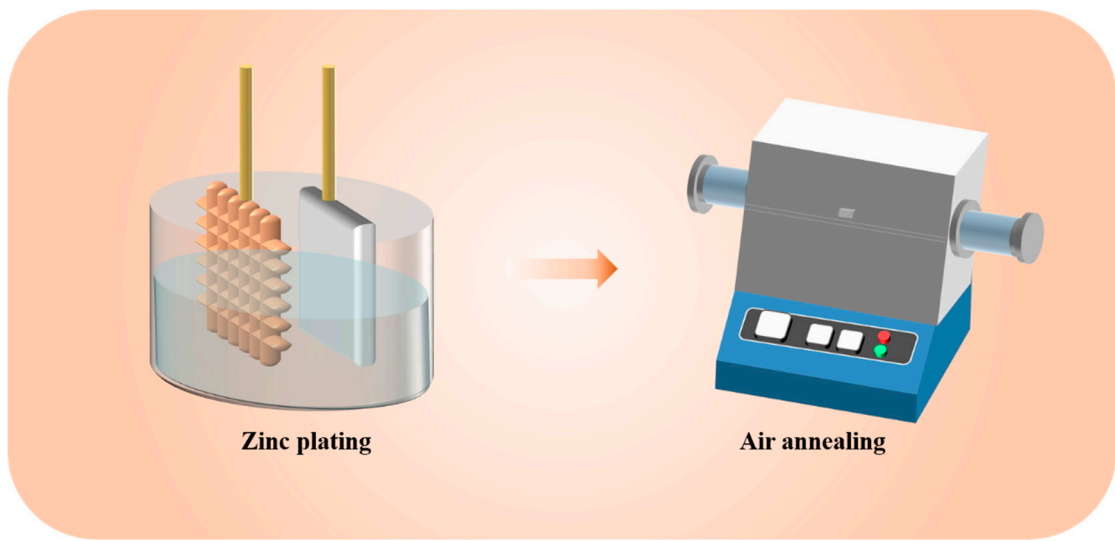

**Figure S1.** Schematic diagram of preparation of zinc oxide coating.

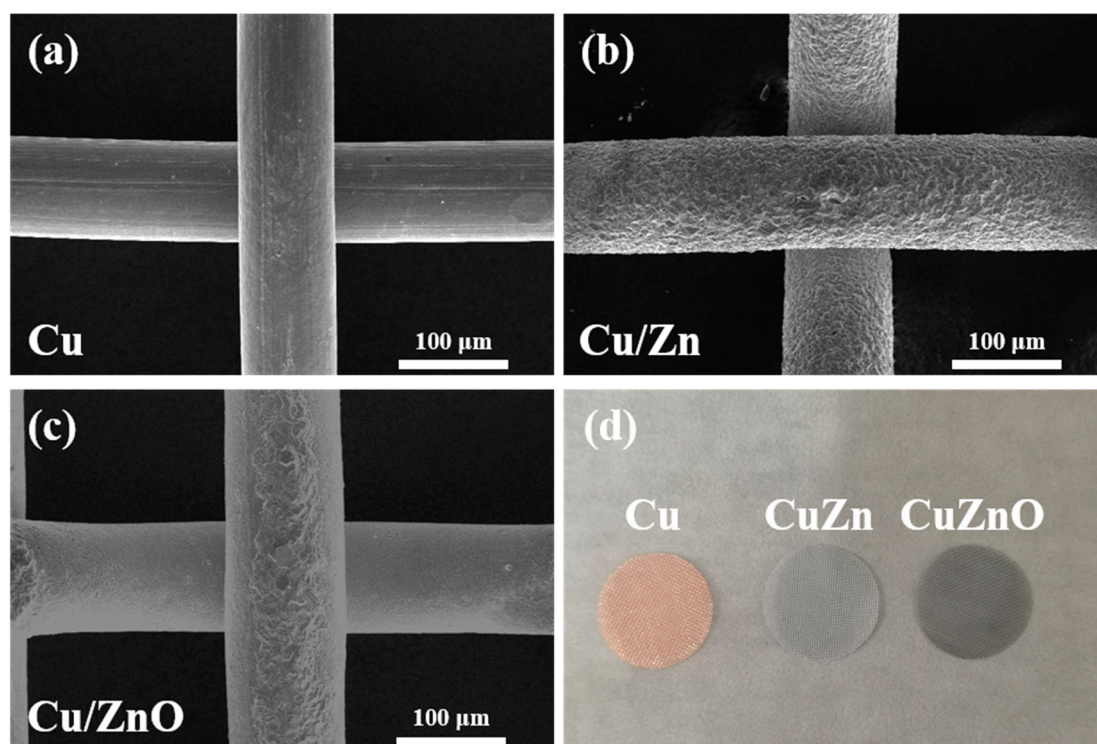

**Figure S2.** SEM image of (a) 3DM Cu, (b) 3DM Cu/Zn, (c) 3DM Cu/ZnO and (d) Sample comparison.

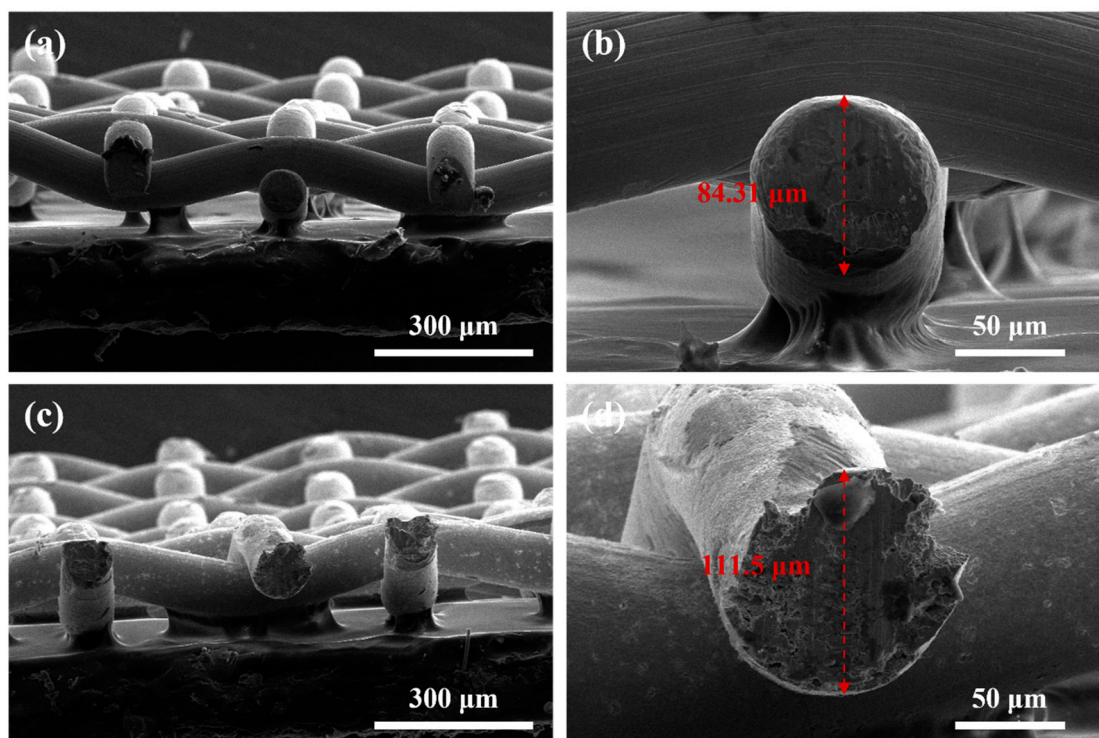

**Figure S3.** The cross-sectional SEM images of (a,b) 3DM Cu and (c,d) Cu/ZnO.

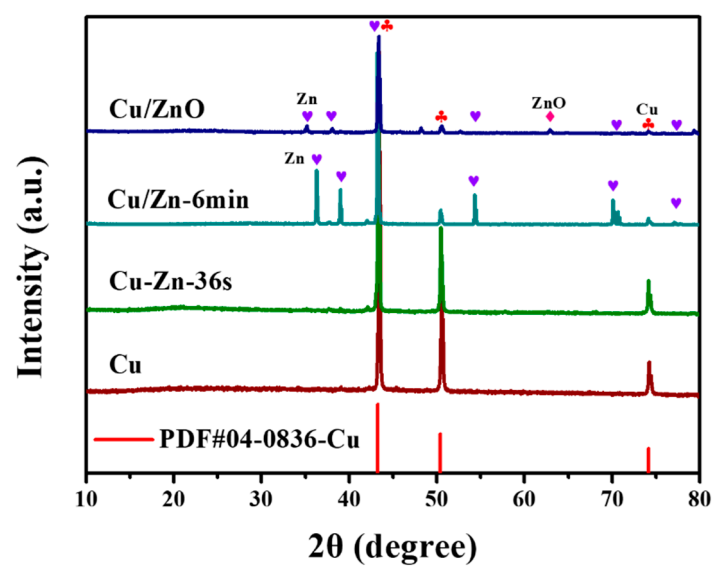

**Figure S4.** XRD pattern of 3DM Cu, 3DM Cu/Zn and 3DM Cu/ZnO.

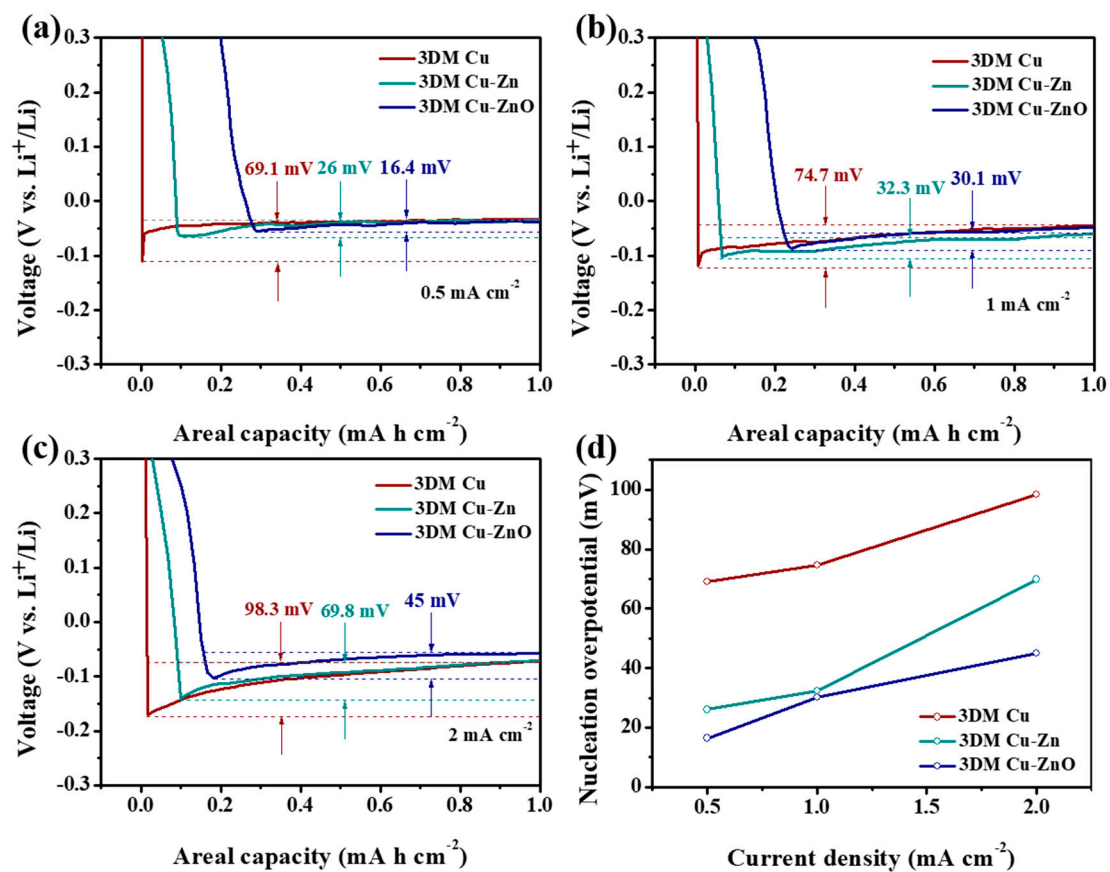

**Figure S5.** The nucleation of 3DM Cu, 3DM Cu/Zn and 3DM Cu/ZnO at current density of 0.5, 1 and 2  $\text{mA cm}^{-2}$ .

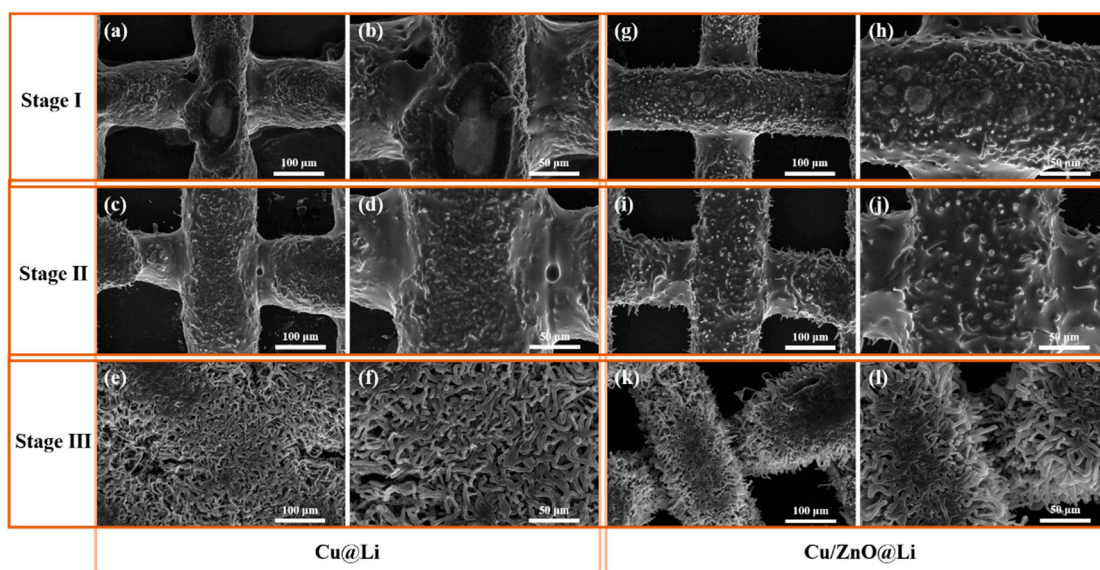

**Figure S6.** SEM images of (a-f) bare Cu and (g-l) Cu/ZnO mesh current collectors along Li plating of 1 (stage I), 3 (stage II) and 6 mAh cm<sup>-2</sup> (stage III).

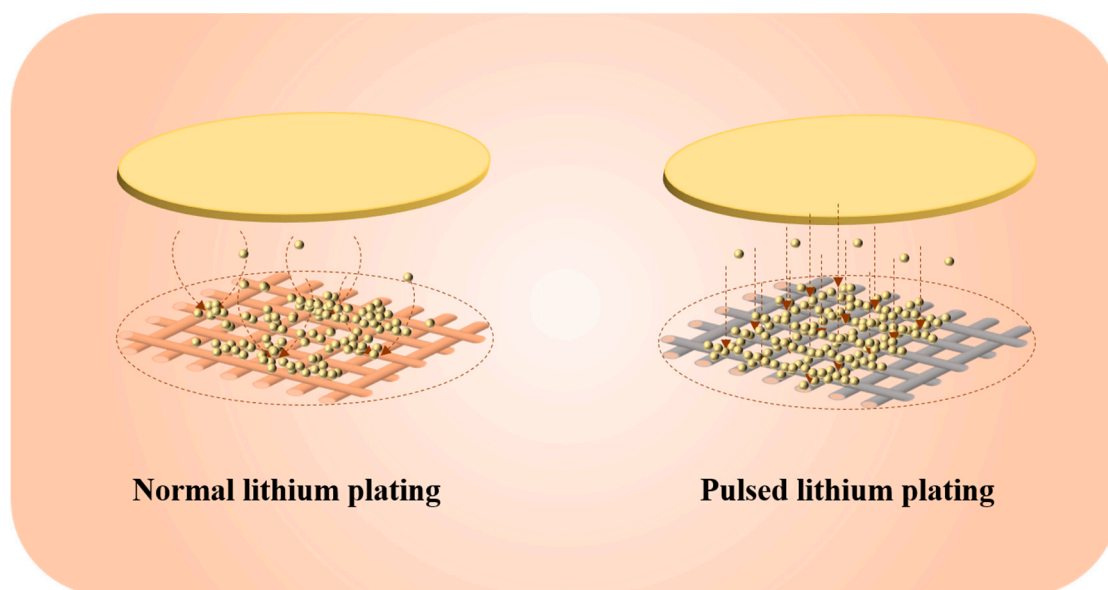

**Figure S7.** Schematic diagram of lithium electroplating deposition.



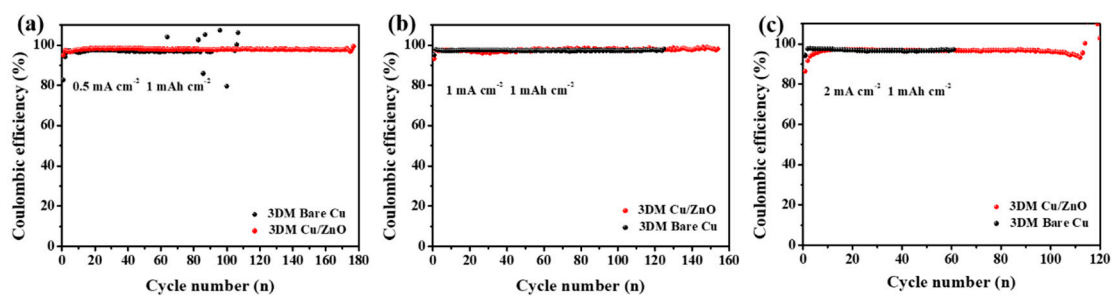

**Figure S8.** The CE of the 3DM Cu@Li and Cu/ZnO@Li-P composite anode during the Li plating/stripping at different current densities with the capacity of 1 mAh cm<sup>-2</sup>.

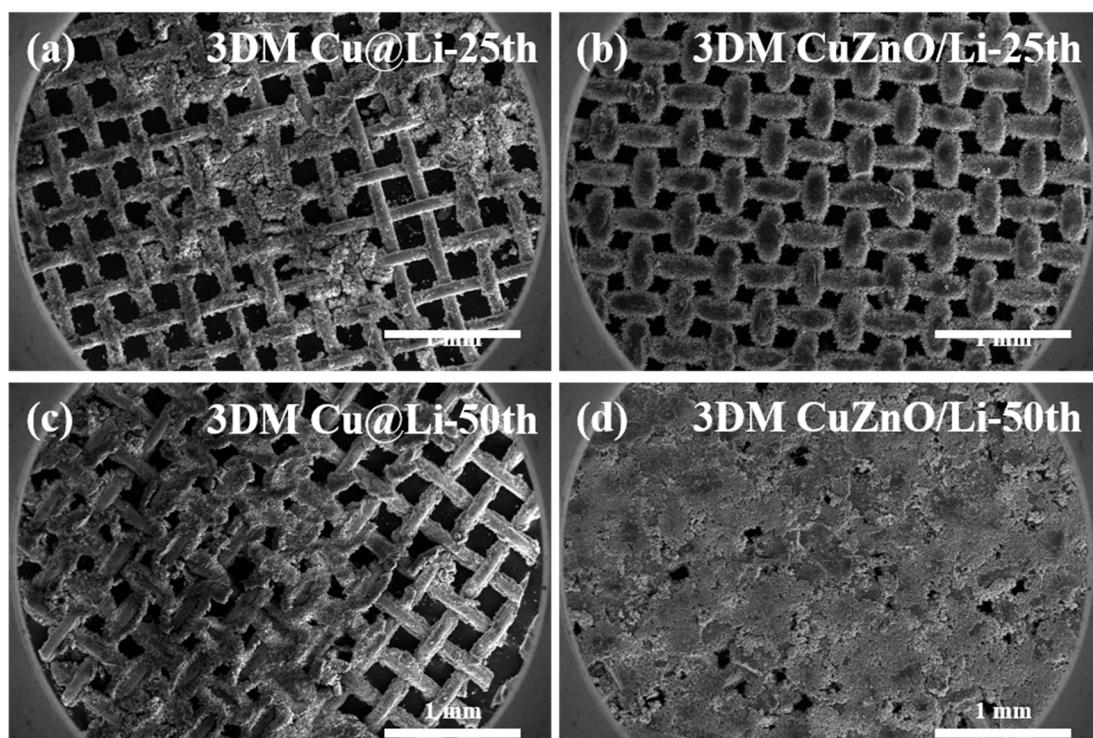

**Figure S9.** SEM image of after 25th and 50th cycles lithium stripping which the surface of (a, c) 3DM Cu@Li anode and (b, d) 3DM Cu/ZnO@Li-P composite anode.

**Table S2.** Comparison of the cycling performance of Li metal anodes with decorating ZnO.

| Materials                   | Current density ( $\text{mA cm}^{-2}$ )/Areal capacity ( $\text{mAh cm}^{-2}$ ) | Cycling stability | Electrolyte                                                |
|-----------------------------|---------------------------------------------------------------------------------|-------------------|------------------------------------------------------------|
| MCuF@Li <sup>[1]</sup>      | 1/2                                                                             | 600 h             | 1 M LiTFSI in DOL/DME (v/v=1) with 1 wt% LiNO <sub>3</sub> |
| Li@LZMNF <sup>[2]</sup>     | 1/1                                                                             | 1200 h            | 1 M LiTFSI in DOL/DME (v/v=1) with 1 wt% LiNO <sub>3</sub> |
| Li@MXene/ZnO <sup>[3]</sup> | 1/1                                                                             | 250 h             | 1 M LiTFSI in DME with 1% FEC                              |
| LiSZ <sup>[4]</sup>         | 1/1                                                                             | 900 h             | 1 M LiTFSI in DOL/DME (v/v=1) with 2 wt% LiNO <sub>3</sub> |
| Cu/ZnO@Li-P<br>(This work)  | 1/1                                                                             | 1500 h            | 1 M LiTFSI in DOL/DME (v/v=1) with 0.2 M LiNO <sub>3</sub> |

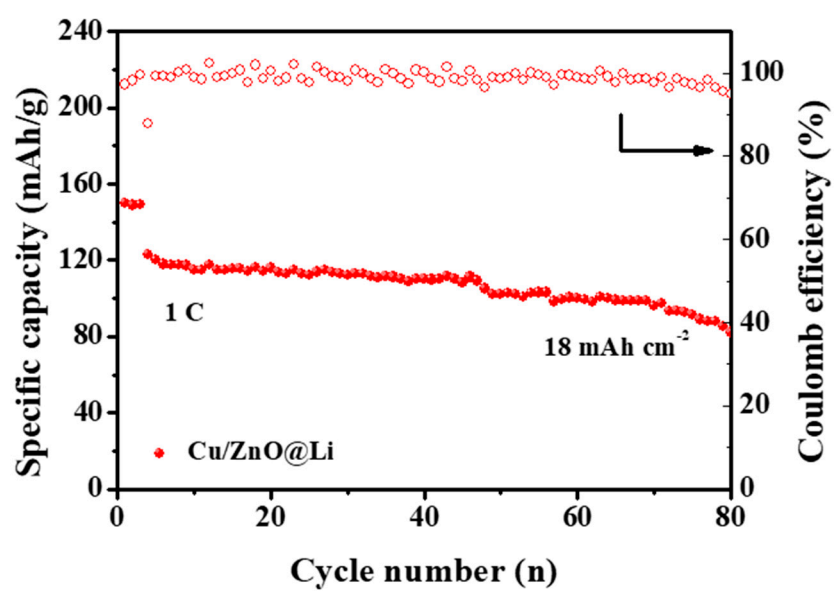

**Figure S10.** Cycling performance of full-cells with 3DM Cu/ZnO@Li-P composite anode at 1 C with three activation cycles at 0.1 C in the beginning.

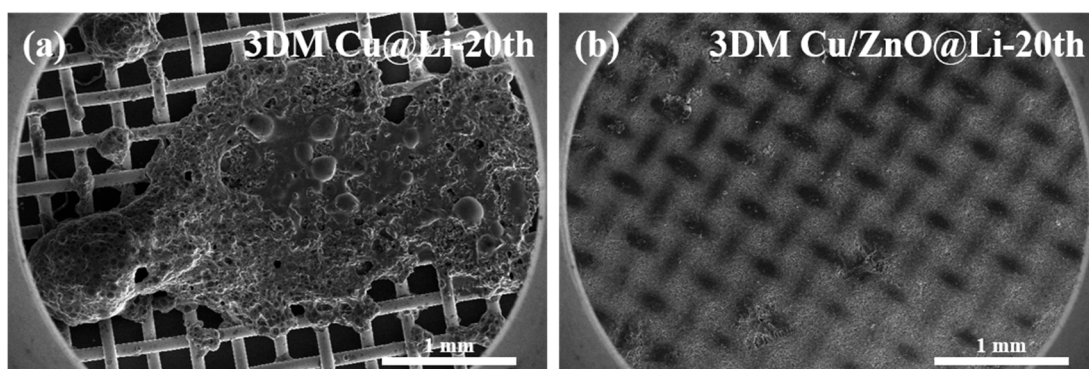

**Figure S11.** SEM images of (a) 3DM Cu@Li and (b) 3DM Cu/ZnO@Li-P composite anodes after 20 cycles lithium stripping in a full-cell.

**Table S3.** Electrochemical parameters of the equivalent circuit for cells constructed from the prepared electrodes.

| Sample                   | $R_1$ ( $\Omega$ ) | $R_2$ ( $\Omega$ ) | CPE (F)               | W ( $\Omega$ S <sup>-0.5</sup> ) |
|--------------------------|--------------------|--------------------|-----------------------|----------------------------------|
| 3DM Cu@Li before cycling | 6.122              | 25.49              | $1.14 \times 10^{-5}$ | 20.38                            |
| 3DM Cu@Li after cycling  | 5.627              | 110.3              | $1.07 \times 10^{-5}$ | 77.25                            |

| Sample                       | $R_1$ ( $\Omega$ ) | $R_2$ ( $\Omega$ ) | $R_3$ ( $\Omega$ ) | CPE <sub>1</sub> (F)  | CPE <sub>2</sub> (F)  | W ( $\Omega$ S <sup>-0.5</sup> ) |
|------------------------------|--------------------|--------------------|--------------------|-----------------------|-----------------------|----------------------------------|
| 3DM Cu/ZnO@Li before cycling | 5.794              | 56.55              | 10.19              | $5.45 \times 10^{-6}$ | $3.64 \times 10^{-4}$ | 30.81                            |
| 3DM Cu/ZnO@Li after cycling  | 4.165              | 4.004              | 10.57              | $9.36 \times 10^{-4}$ | $1.44 \times 10^{-2}$ | 1819                             |

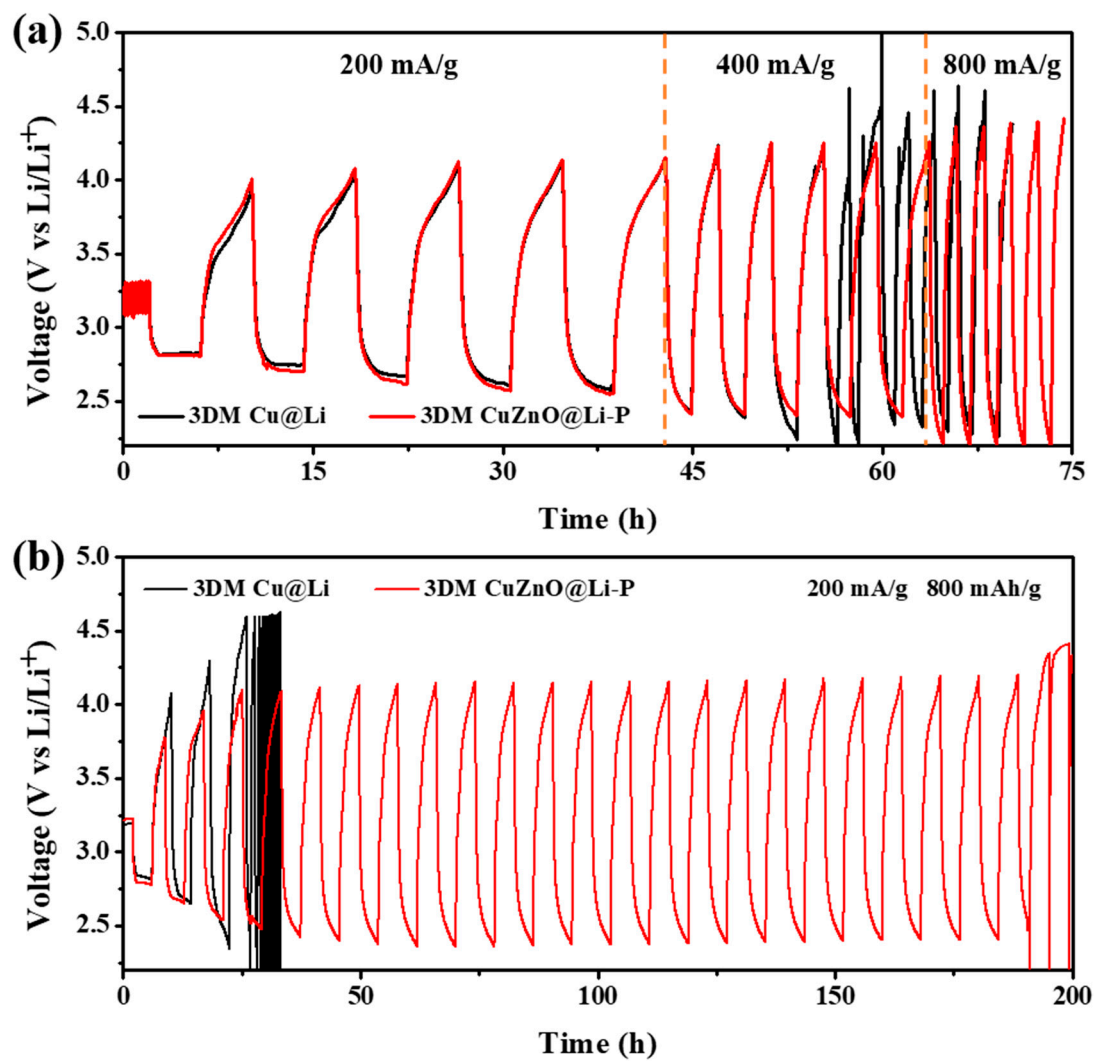

**Figure S12.** (a) Rate performance and (b) cycle performance of lithium-oxygen batteries constructed with 3DM Cu/ZnO@Li-P composite anode.

## Reference

- [1] Zhou, Y.; Zhao, K.; Han, Y.; Sun, Z.H.; Zhang, H.T.; Xu, L.Q.; Ma, Y.F.; Chen, Y.S. A Nitrogen-Doped-Carbon/ZnO Modified Cu Foam Current Collector for High-Performance Li Metal Batteries. *J. Mater. Chem. A*. **2019**, 7, 5712.
- [2] Sun, C.Z.; Li, Y.P.; Jin, J.; Yang, J.H.; Wen, Z.Y. ZnO Nanoarray-Modified Nickel Foam as A Lithiophilic Skeleton to Regulate Lithium Deposition for Lithium-Metal Batteries. *J. Mater. Chem. A*. **2019**, 7, 7752.
- [3] Shen, Y.X.; Pu, Z.Y.; Zhang, Y.R.; Chen, Y.; Zhang, H.; Wang, N.T.; Qiu, H.L.; Li, Y.M. MXene/ZnO Flexible Freestanding Film as A Dendrite-Free Support in Lithium Metal Batteries. *J. Mater. Chem. A*. **2022**, 10, 17199.
- [4] Ni, C.K.; Mao, J.T.; Cheng, Z.L.; Pan, P.; Jiang, L.Y.; Wang, Z.X.; Zhang, M.M.; Zhang, Y.R.; Xing, Y.S.; Zeng, Y.; Chen, Q.; Hu, Y. Si/ZnO Framework: 3D Lithiophilic Structure for Dendrite-Free Lithium Metal Batteries. *J. Alloy. Compd.* **2021**, 25, 876.
